# Supplementary material for: Aerobic Exercise Induces Alternative Splicing of Neurexins in Frontal Cortex
Source: MDPI journal article supplement (doi:10.3390/jfmk6020048), 2021-05-31
Supplement: s1 [file s1]

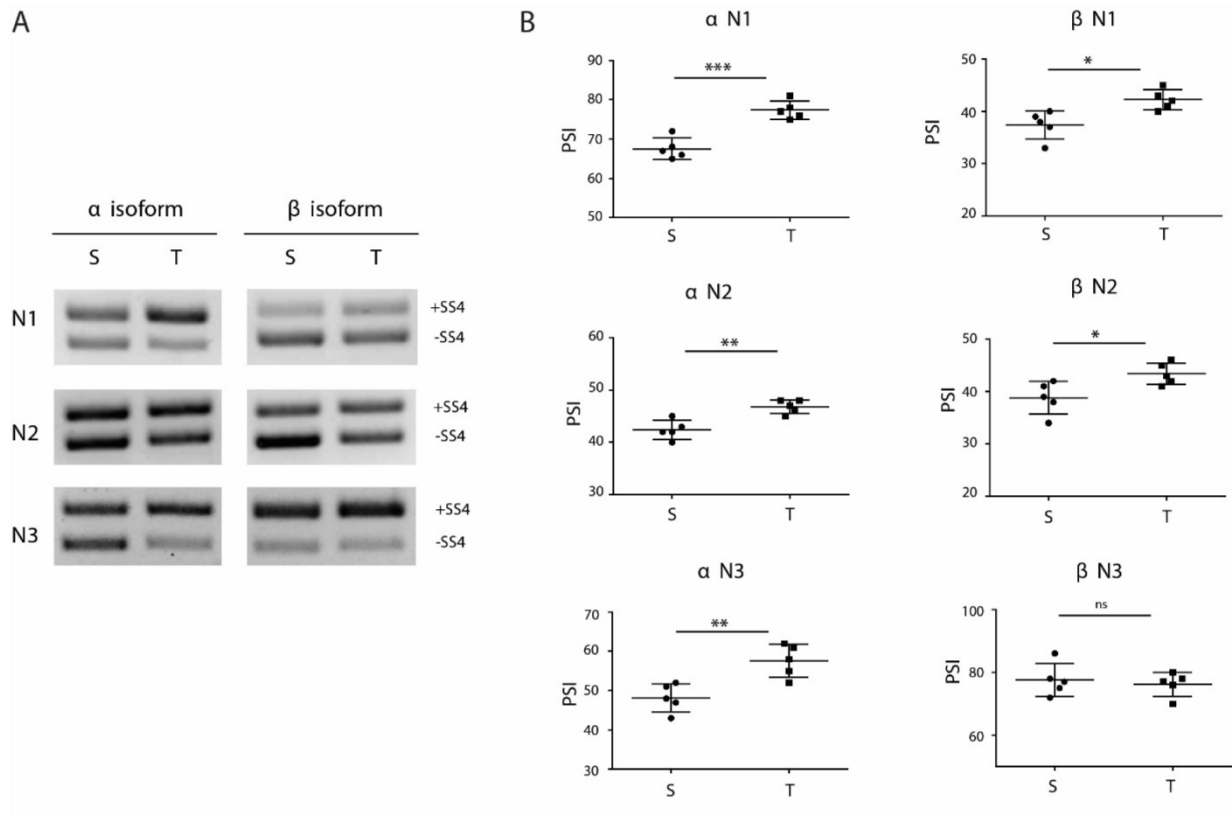

**Figure S1. CP aerobic exercise promotes +SS4 fragment in alpha/beta *Nrxns* isoforms.** **A)** RT-PCR analysis showing the representative splicing pattern of  $\alpha/\beta$  *Nrxns* (1-3) in sedentary mice and after CP protocol. **B)** Densitometric analysis (Image J-win64) is shown as scatter plots of PSI (percent spliced in) for  $\alpha$ -*Nrxns* ( $\alpha$ -*Nrxn1*  $77.40\% \pm 1.03$  in T vs  $67.60\% \pm 1.21$  in S,  $p=0.0003$ ;  $\alpha$ -*Nrxn2*  $46.80\% \pm 0.58$  in T vs  $42.40\% \pm 0.81$  in S,  $p=0.0023$ ;  $\alpha$ -*Nrxn3*  $57.60\% \pm 1.86$  in T vs  $48.20\% \pm 1.59$  in S,  $p=0.0050$ ) and  $\beta$ -*Nrxns* ( $\beta$ -*Nrxn1*  $42.20\% \pm 0.86$  in T vs  $37.40\% \pm 1.21$  in S,  $p=0.0119$ ;  $\beta$ -*Nrxn2*  $43.40\% \pm 0.93$  in T vs  $38.80\% \pm 1.39$  in S,  $p=0.0251$ ;  $\beta$ -*Nrxn3*  $76.20\% \pm 1.69$  in T vs  $77.60\% \pm 2.34$  in S,  $p=0.6400$ ) \* $p<0.05$ ; \*\* $p<0.01$ ; \*\*\* $p<0.001$ . Error bars represent SD.
